# Supplementary material for: Development of a smart pH-responsive nano-polymer drug, 2-methoxy-4-vinylphenol conjugate against the intestinal pathogen, Vibrio cholerae
Source: Research Square preprint supplement (doi:10.21203/rs.3.rs-1823967/v1), 2022-07-21
Supplement: Supplementary file 1 [file 4f4e47ab81c0deaf2c2589f9.docx]

**Development of a smart pH-responsive nano-polymer drug, 2-methoxy-4-vinylphenol conjugate against the intestinal pathogen, *Vibrio cholerae***

Hema Bhagavathi Sarveswari1, Krishna Kant Gupta2, Ramya Devi3* and Adline Princy Solomon1*

*1 Quorum Sensing Laboratory, Centre for Research in Infectious Diseases (CRID), School of Chemical and Biotechnology, SASTRA Deemed to be University, Thanjavur, 613401, India.*

*2 School of Chemical and Biotechnology, SASTRA Deemed to be University, Thanjavur, 613401, India.*

*3 Pharmaceutical Technology Laboratory, School of Chemical and Biotechnology, SASTRA Deemed to be University, Thanjavur, 613401, India.*

**Supplementary File**

**Figure S1**  Particle size (A) and zeta potential (B) of polymeric (CAP) nanoformulation of 2M4VP.


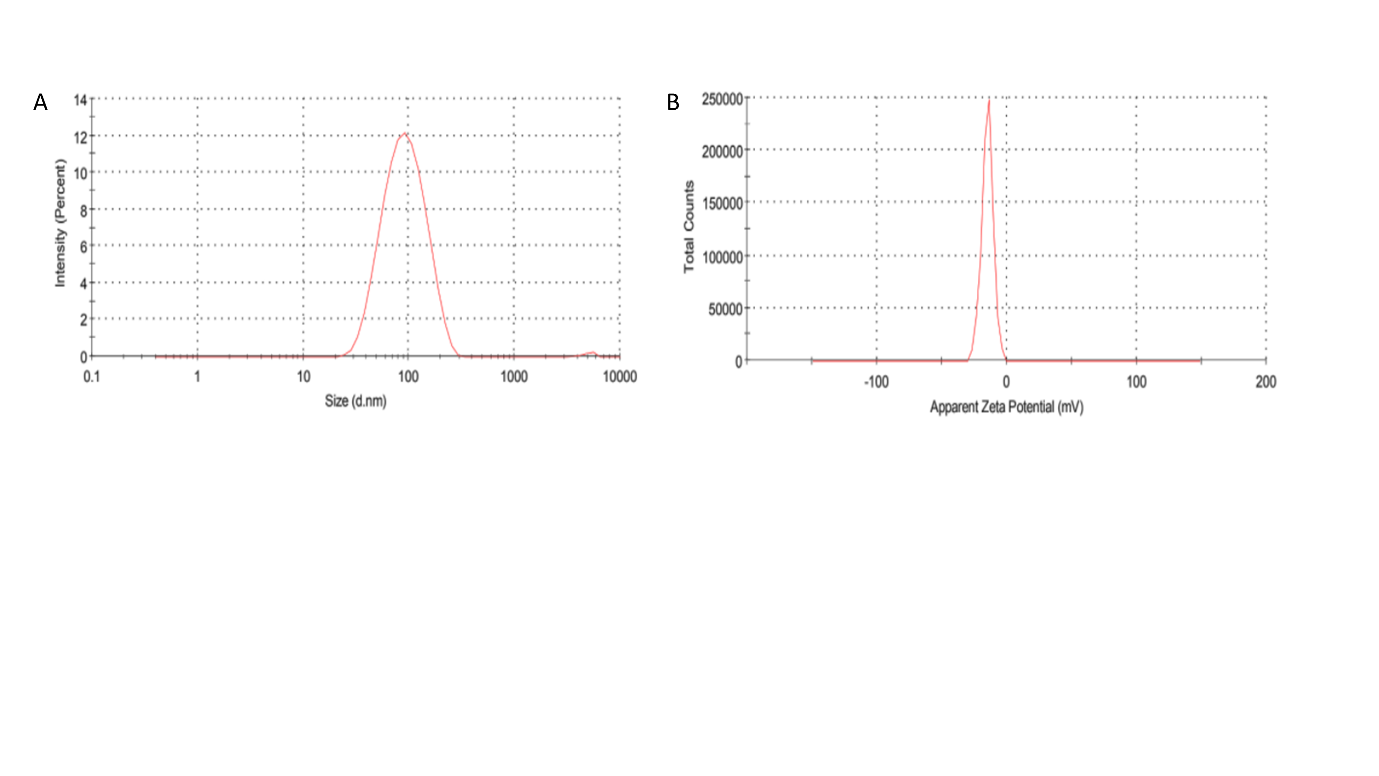


**Figure S2**  Effect of CAP-2M4VP on the growth of *V. cholerae* MTCC 3905 and HYR14 after 24 hours at pH 6.

**
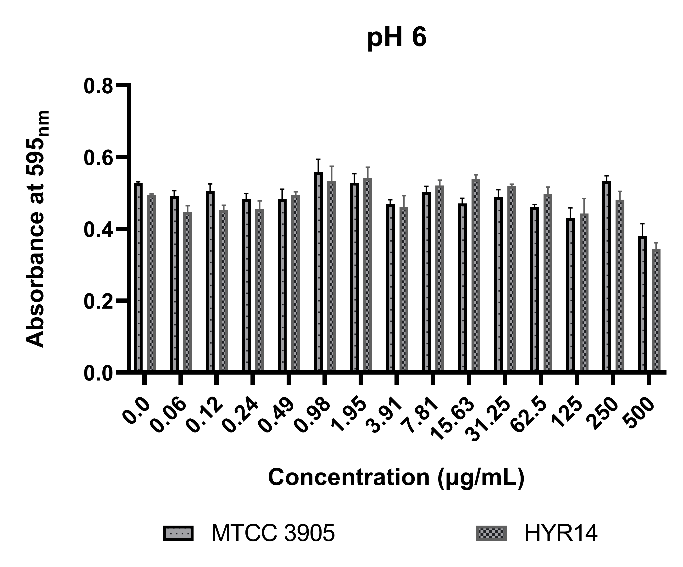
**

**
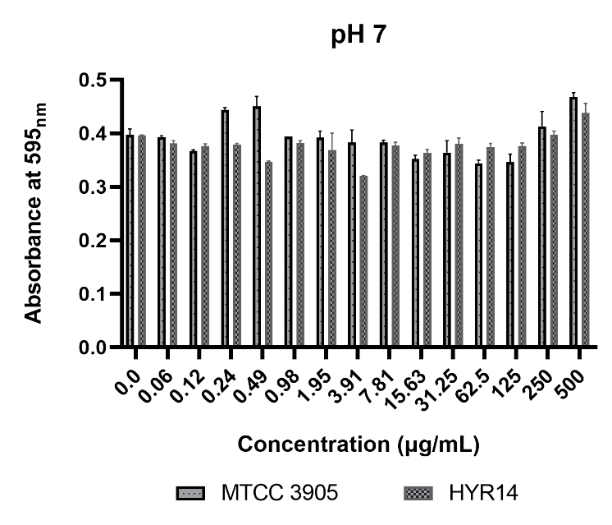
 Figure S3** Effect of CAP-2M4VP on the growth of *V. cholerae* MTCC 3905 and HYR14 after 24 hours at pH 7.

**
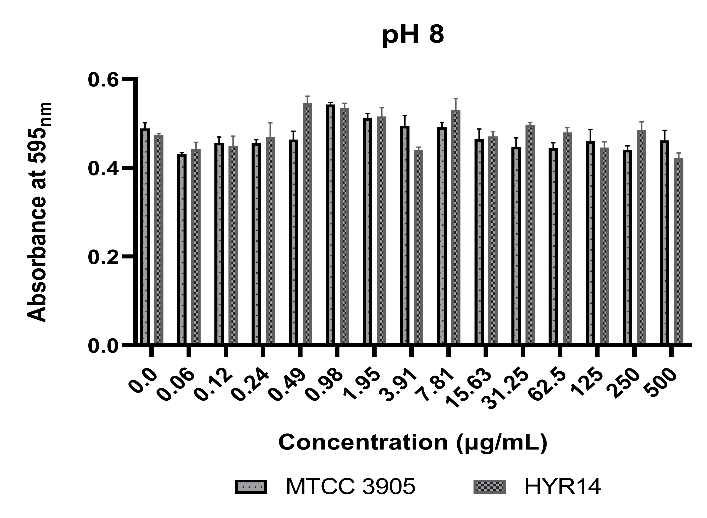
Figure S4** Effect of CAP-2M4VP on the growth of *V. cholerae* MTCC 3905 and HYR14 after 24 hours at pH 8.

**Figure S5** Effect of CAP-2M4VP on the growth of *V. cholerae* MTCC 3905 and HYR14 after 24 hours at pH 9.

**
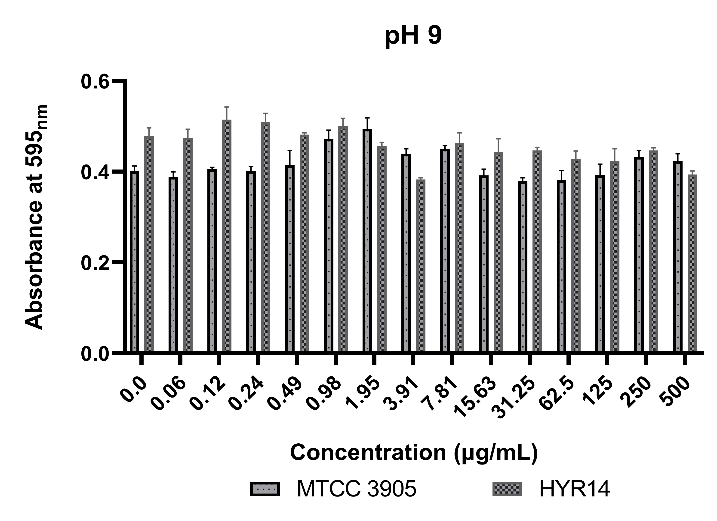
**

**Table S1** Release kinetics of CAP polymeric nano-formulation of 2M4VP.

| **Kinetics Model** | **Parameters** | **pH 1.2** | **pH 5.8** | **pH 7** | **pH 8** | **pH 9** |
| --- | --- | --- | --- | --- | --- | --- |
| **Zero order** | **R2** | -0.4503 | -1.2436 | -0.4118 | -0.4304 | -1.7858 |
|  | **K0** | 1.719 | 1.900 | 3.148 | 1.922 | 1.934 |
|  | **SS** | 6237.5447 | 9447.6506 | 20041.2991 | 7435.7775 | 11611.2526 |
| **First order** | **R2** | 0.0271 | -0.5434 | 0.6572 | 0.0768 | -0.9007 |
|  | **K1** | 0.026 | 0.031 | 0.121 | 0.031 | 0.033 |
|  | **SS** | 4184.1863 | 6499.3417 | 4866.4044 | 4799.2933 | 7922.0191 |
| **Higuchi** | **R2** | 0.7066 | 0.3813 | 0.7147 | 0.6958 | 0.1608 |
|  | **KH** | 9.457 | 10.531 | 17.267 | 10.531 | 10.831 |
|  | **SS** | 1261.7284 | 2605.5058 | 4050.4897 | 1581.5030 | 3497.7576 |
| **Korsemeyer-Peppas** | **R2** | 0.9905 | 0.9767 | 0.9900 | 0.9808 | 0.9712 |
|  | **KKP** | 19.779 | 26.327 | 35.978 | 22.210 | 29.033 |
|  | **n** | 0.261 | 0.202 | 0.262 | 0.258 | 0.179 |
|  | **SS** | 40.7947 | 98.3140 | 142.5851 | 99.9653 | 120.2230 |
| **Hixson-Crowell** | **R2** | -0.1172 | -0.7564 | 0.5100 | -0.0728 | -1.1741 |
|  | **KHC** | 0.008 | 0.009 | 0.032 | 0.009 | 0.009 |
|  | **SS** | 4804.8561 | 7396.2969 | 6955.8384 | 5577.0266 | 9061.8175 |
| **Hopfenberg** | **R2** | 0.0268 | -0.5439 | 0.6571 | 0.0762 | -0.9011 |
|  | **KHB** | 0.000 | 0.000 | 0.000 | 0.000 | 0.000 |
|  | **SS** | 4185.4535 | 6501.1905 | 4867.3656 | 4802.0359 | 7923.7080 |
| **Baker-Lonsdale** | **R2** | 0.7990 | 0.5445 | 0.9086 | 0.7928 | 0.3837 |
|  | **KBL** | 0.002 | 0.003 | 0.010 | 0.003 | 0.003 |
|  | **SS** | 864.6038 | 1917.9818 | 1297.7094 | 1077.3329 | 2568.6804 |
| **Weibull** | **R2** | 0.9943 | 0.9739 | 0.9707 | 0.9748 | 0.9944 |
|  | **SS** | 24.6371 | 110.0523 | 416.2617 | 131.1917 | 23.3906 |
| **Gompertz** | **R2** | 0.9893 | 0.9656 | 0.9345 | 0.9583 | 0.9831 |
|  | **SS** | 45.8105 | 144.9309 | 930.3335 | 216.7893 | 70.5727 |
